# Supplementary material
Source: PubMed Central journal article supplement (PMC6520164)
Supplement: NIHMS1519870-supplement-1.pdf [file NIHMS1519870-supplement-1.pdf]

# **Supplementary FIGURES**

Ahmadi et al

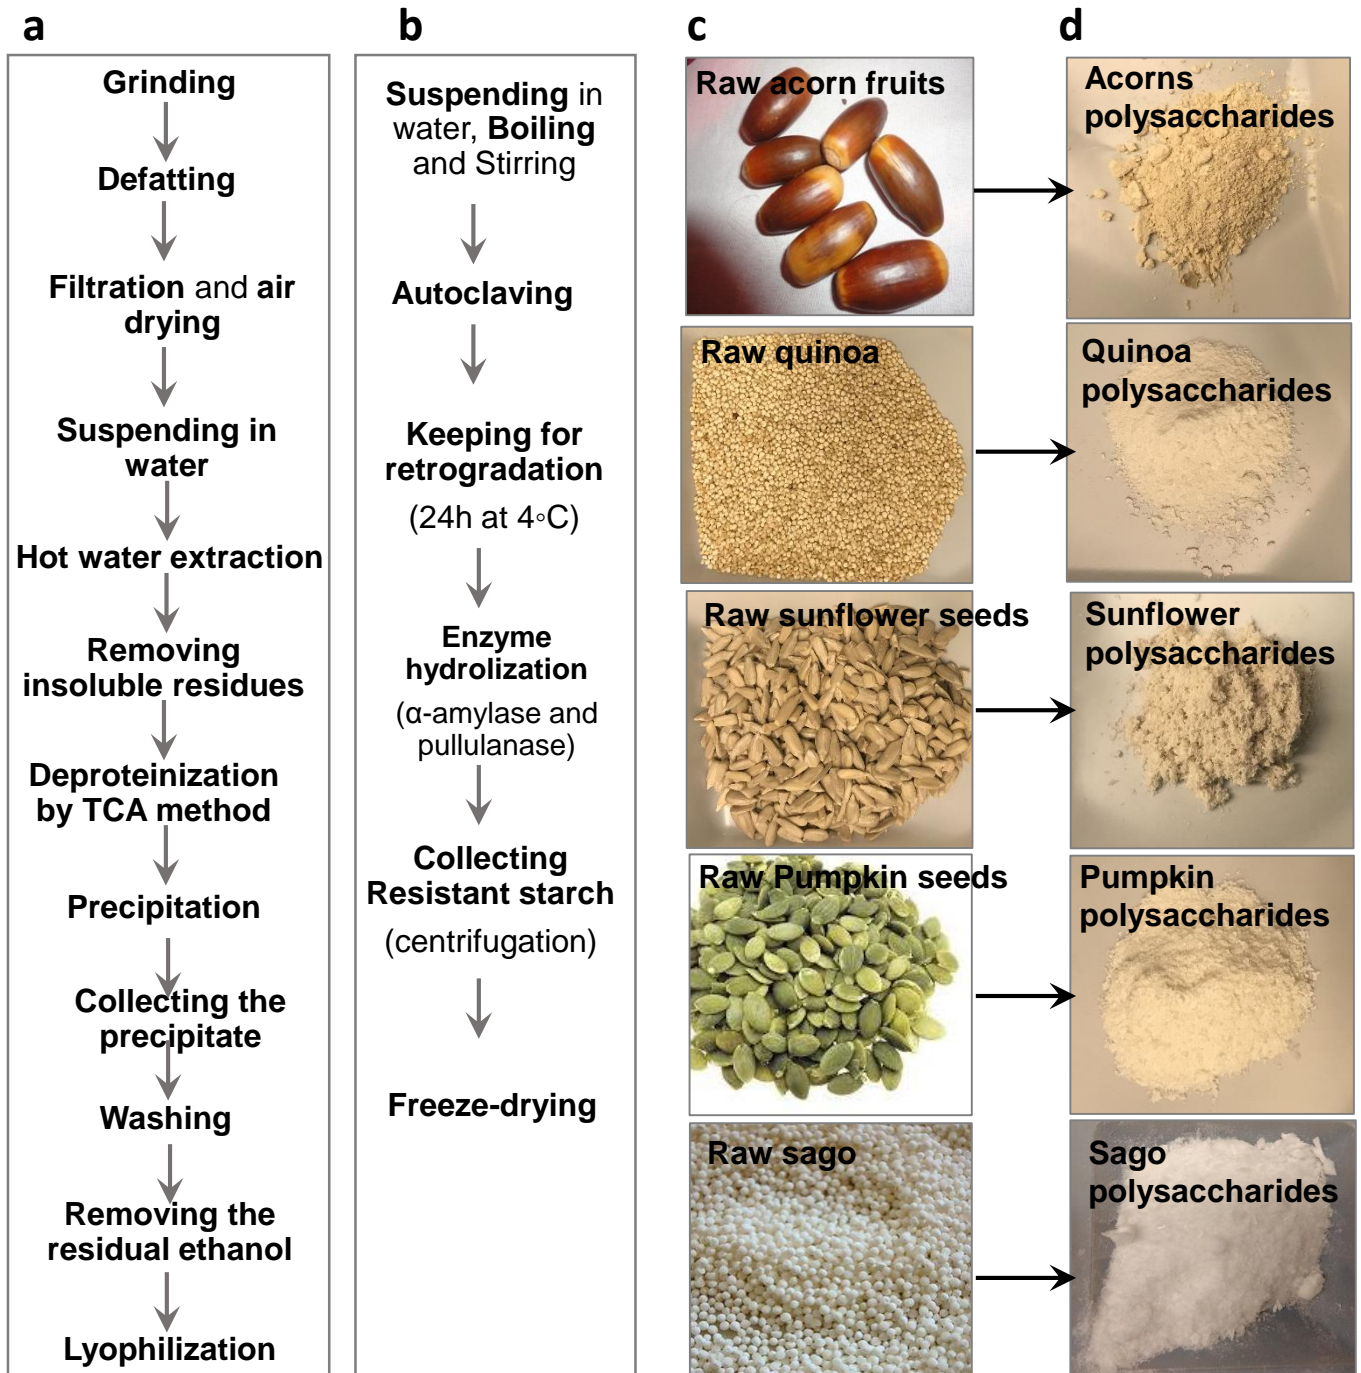

**Supplementary Figure 1. Isolation of prebiotics.** a,b) The flow –chart of polysaccharide extraction process from acorn, quinoa, sun flower and pumpkin seeds (a) and from Sago (b). c,d) Raw materials (c) used for prebiotics/polysaccharides (d) isolation.

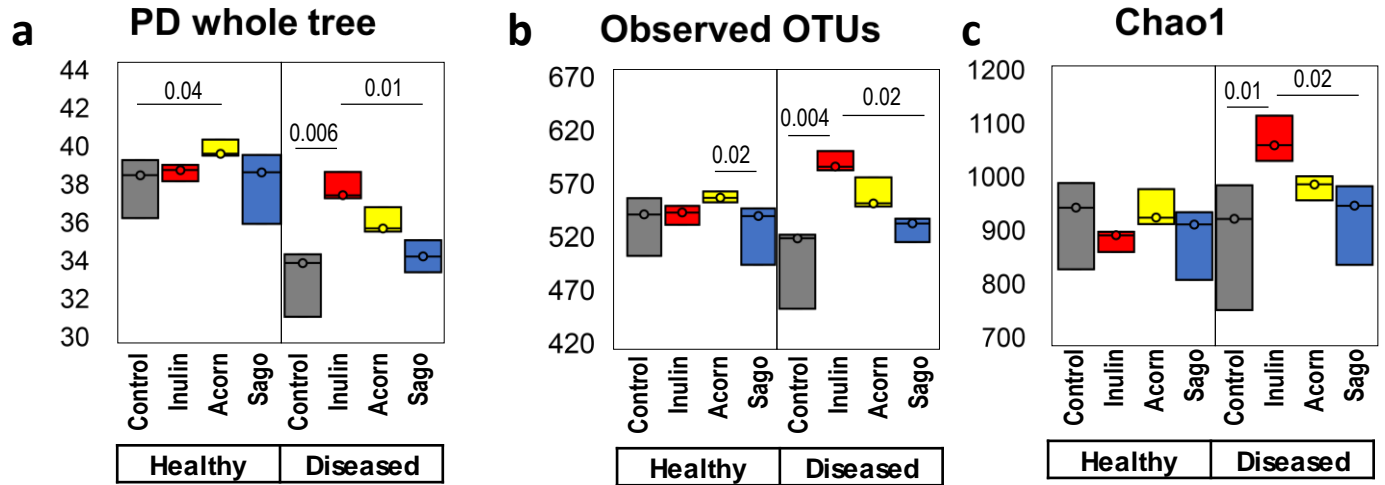

**Supplementary Figure 2. Impact of prebiotics treatments on  $\alpha$ -diversity indices in healthy and diseased fecal microbiome.** a-c) Phylogenetic degree (PD) whole tree (a), observed operational taxonomic units (OTUs) (b) and Chao1 (c) in healthy and diseased fecal microbiome after prebiotics treatments. Values presented here are mean  $\pm$ SD/SEM.

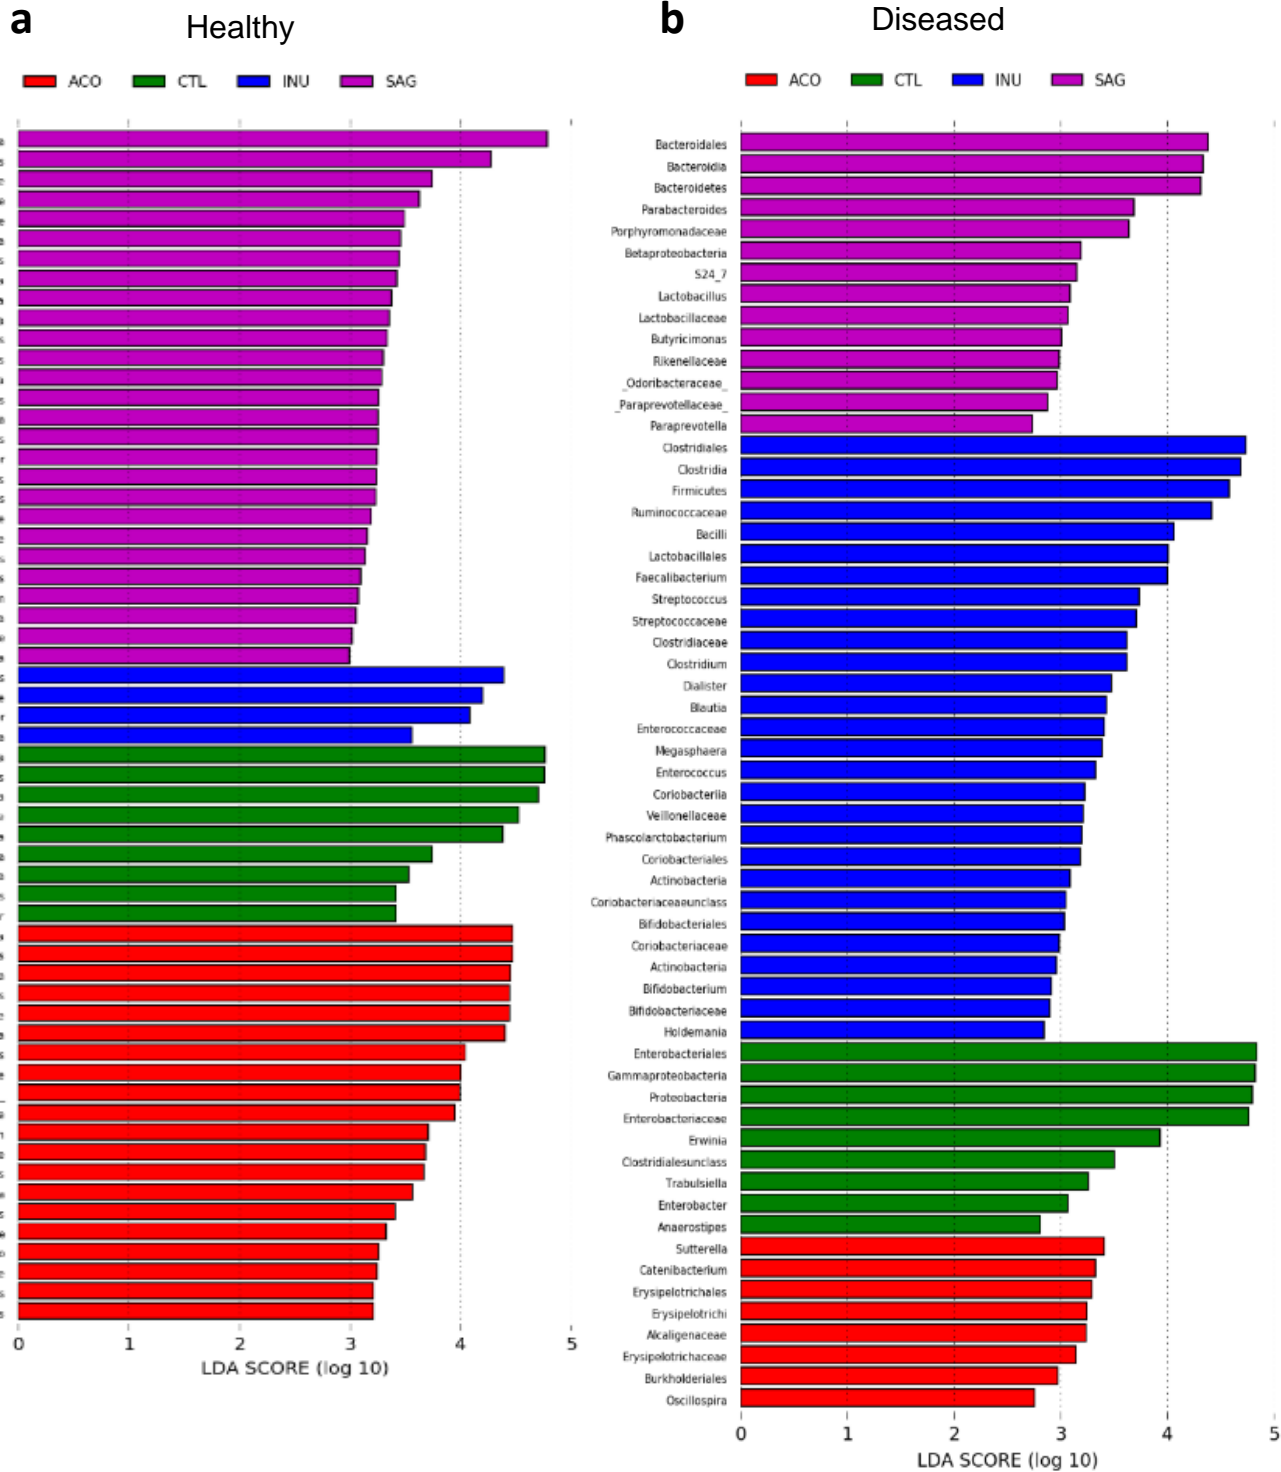

**Supplementary Figure 3. Linear discrimination analysis (LDA) effects of prebiotics treatments on healthy (a) and diseased (b) fecal microbiome.**

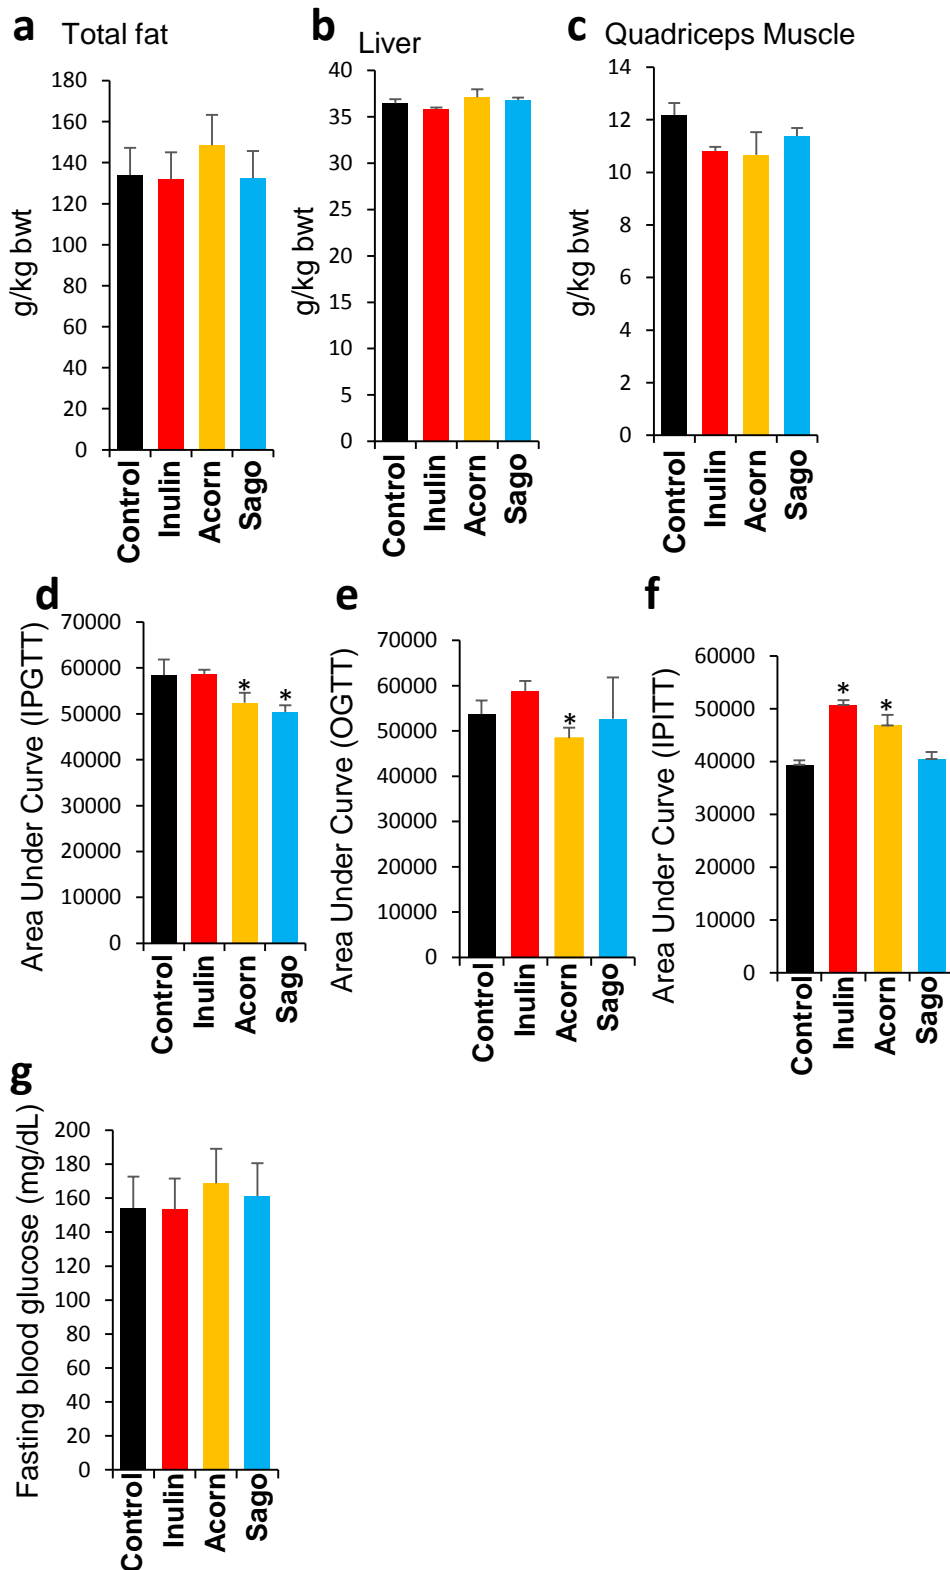

**Supplementary Figure 4. Effects of prebiotics treatments on organ weights like total fat depots (a), liver (b), quadriceps muscles (c), area under curve (d-e) during IPGTT, OGTT and IPITT and fasting blood glucose (g) in HFD-fed mice after 7 weeks. Values presented here are mean  $\pm$ SD/SEM. P values \* $<$ 0.05.**

# Mouse data

# Supplementary FIGURE S5

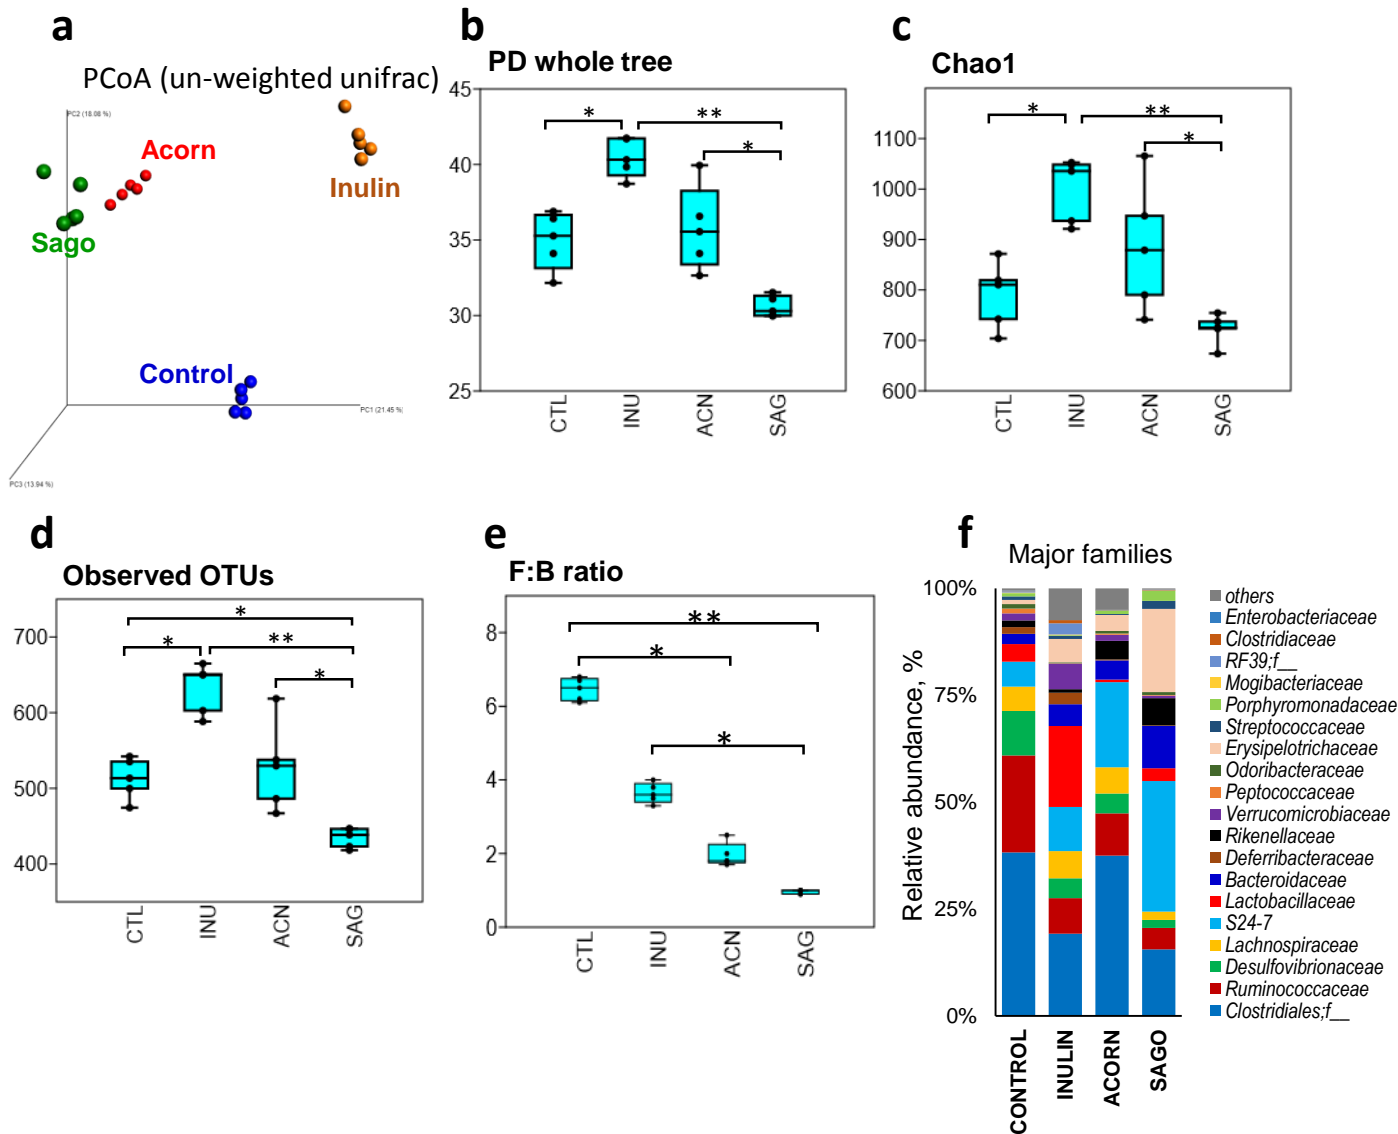

**Supplementary Figure 5. Impact of prebiotics feeding on gut microbiome signature of HFD-fed mice.** a) PCoA analysis (unweighted unfrac) presenting  $\beta$ -diversity of gut microbiome signature after prebiotics feeding in HFD-fed mice. b-d) Phylogenetic degree (PD) whole tree (b), Chao1 (c), and observed operational taxonomic units (OTUs) (d) in HFD-fed mice after prebiotics treatments. e) Firmicutes: Bacteroides (F:B) ratio in HFD-fed mice after 7 weeks of prebiotics feeding. f) Major bacterial families enriched in microbiome analysis that are impacted upon prebiotics feeding in HFD-fed mice. CTL: Control, INU: inulin, ACO: acorn, and SAG: sago. Values presented here are mean  $\pm$ SD/SEM. P values \* $<0.05$  and \*\* $<0.01$ .

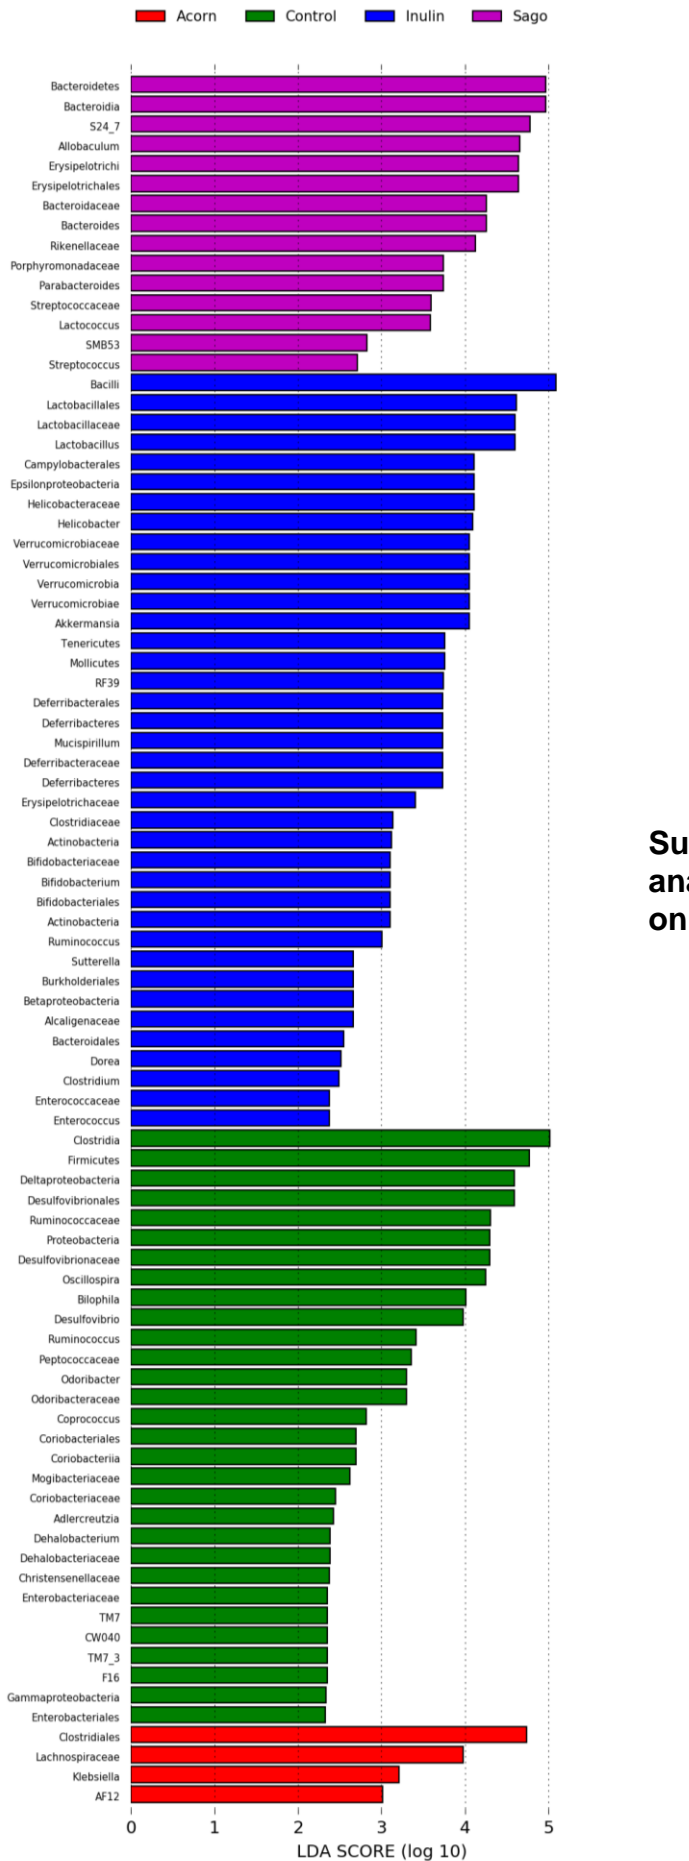

**Supplementary Figure 6. Linear discrimination analysis (LDA) effects of prebiotics treatments on gut microbiome of HFD-fed mice.**

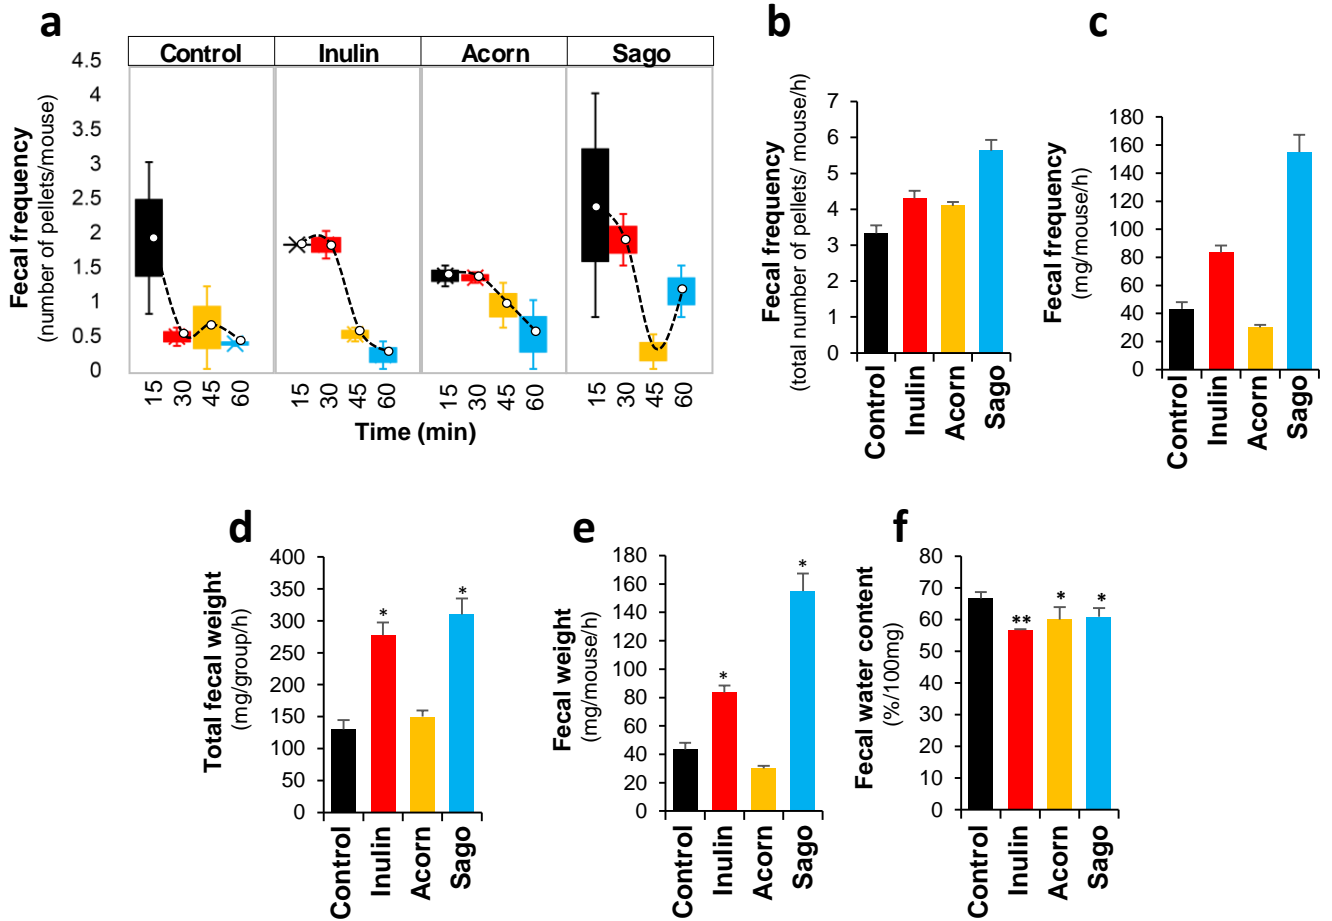

Supplementary Figure 7. Effects of prebiotics treatments on fecal frequency (a-c), fecal weight (d,e) and fecal water content in HFD-fed mice after 7 weeks. Values presented here are mean  $\pm$ SD/SEM. P values \* $<0.05$  and \*\* $<0.01$ .
